# Supplementary material for: PINK1 protects against dendritic cell dysfunction during sepsis through the regulation of mitochondrial quality control
Source: PubMed Central journal article supplement (PMC9945621; doi:10.1186/s10020-023-00618-5), 2023-02-21
Supplement: 10020_2023_618_MOESM3_ESM.pdf [file 10020_2023_618_MOESM3_ESM.pdf]

# 原始条带-figure 1f

Sham Sham 12 h 24 h 48 h 72 h

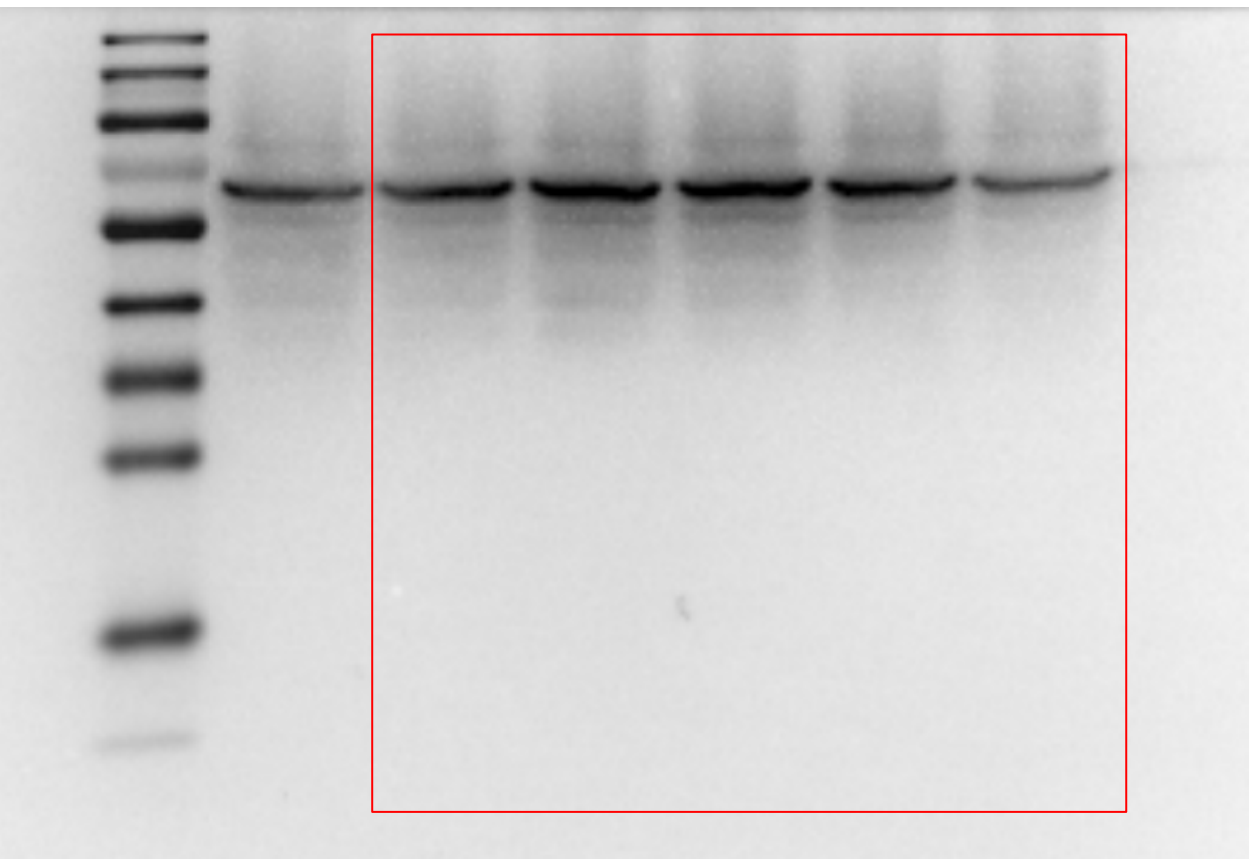

PINK1

Sham Sham 12 h 24 h 48 h 72 h

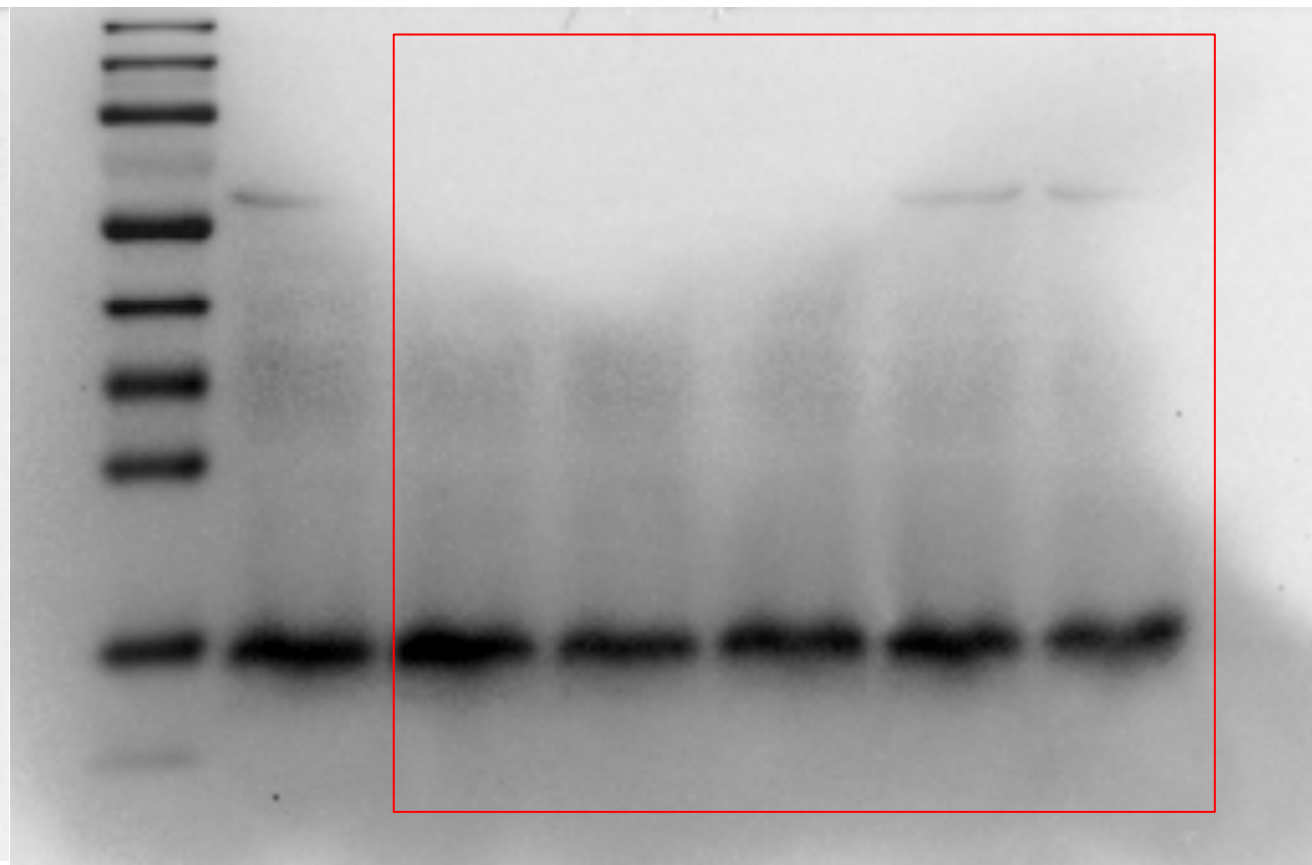

COXIV

# 原始条带-figure 2f

Control 2 h 4 h 8 h 16 h 24 h

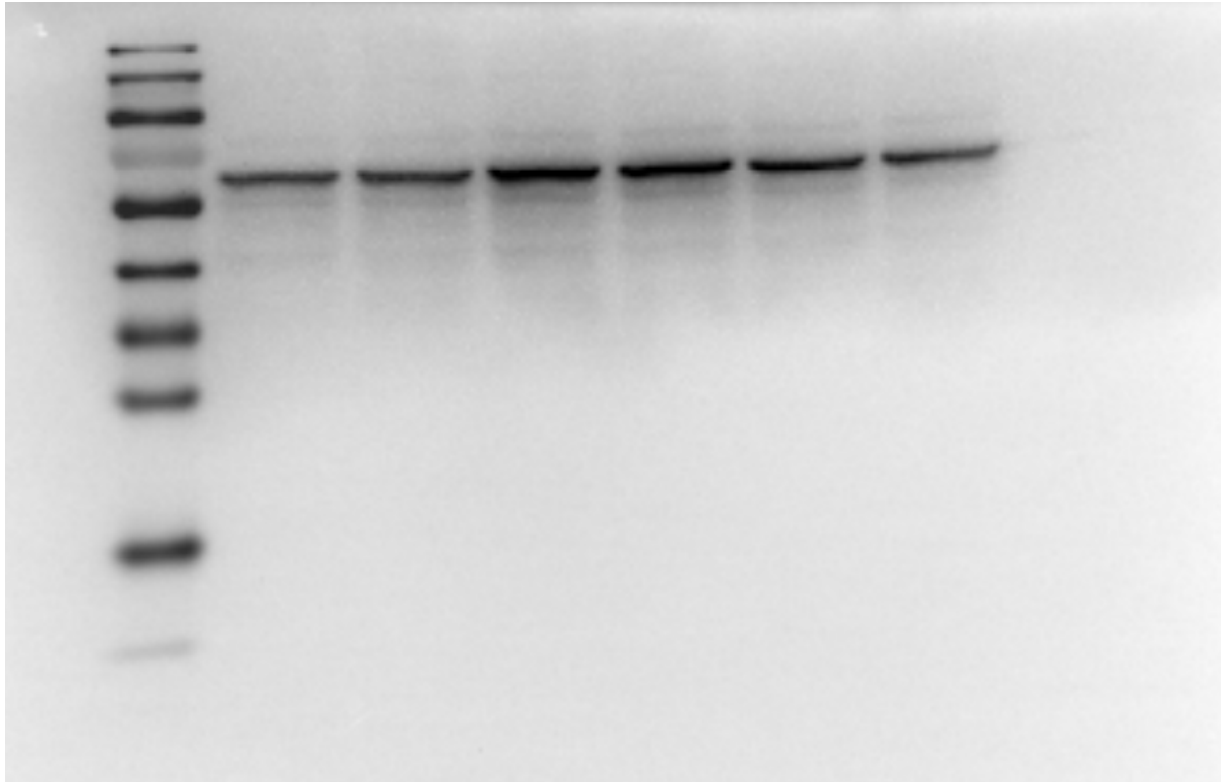

PINK1

Control 2 h 4 h 8 h 16 h 24 h

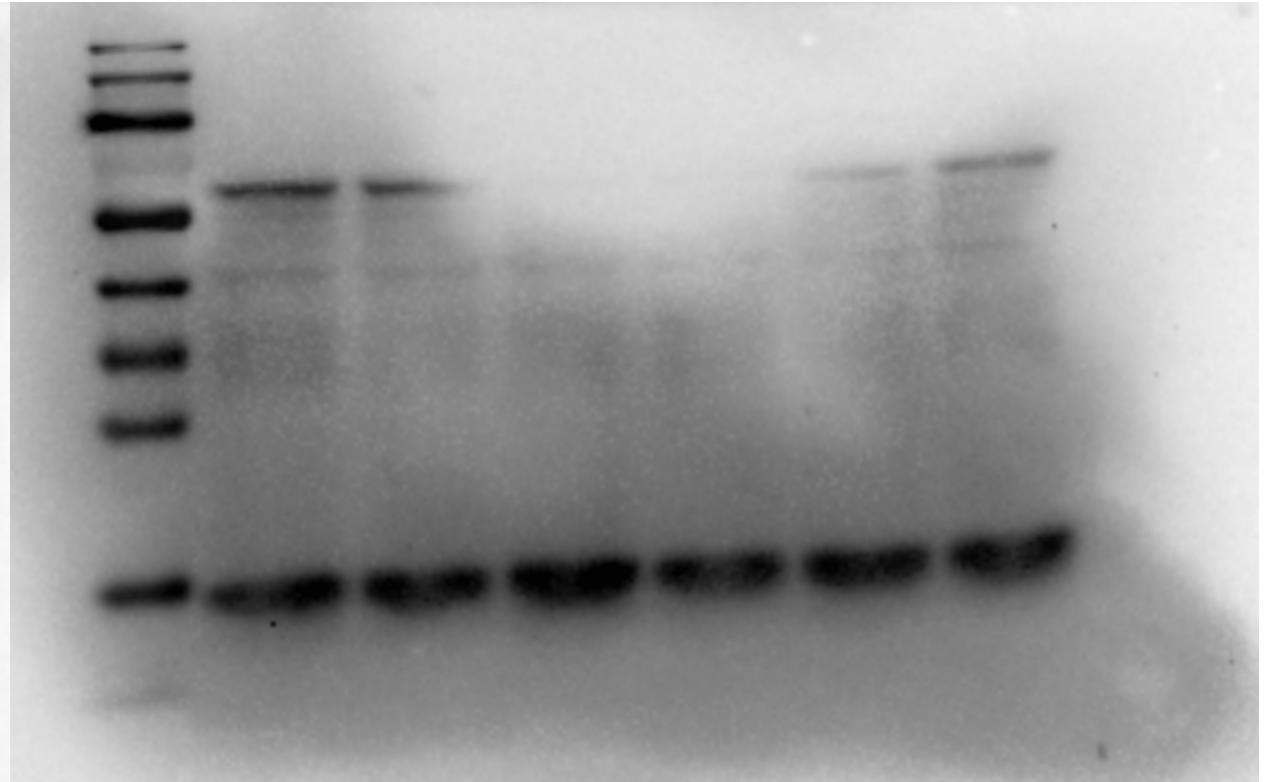

COXIV

# 原始条带-figure 3a

Marker WT PINK1<sup>-/-</sup> WT WT PINK1<sup>-/-</sup> WT PINK1<sup>-/-</sup> WT WT PINK1<sup>-/-</sup>

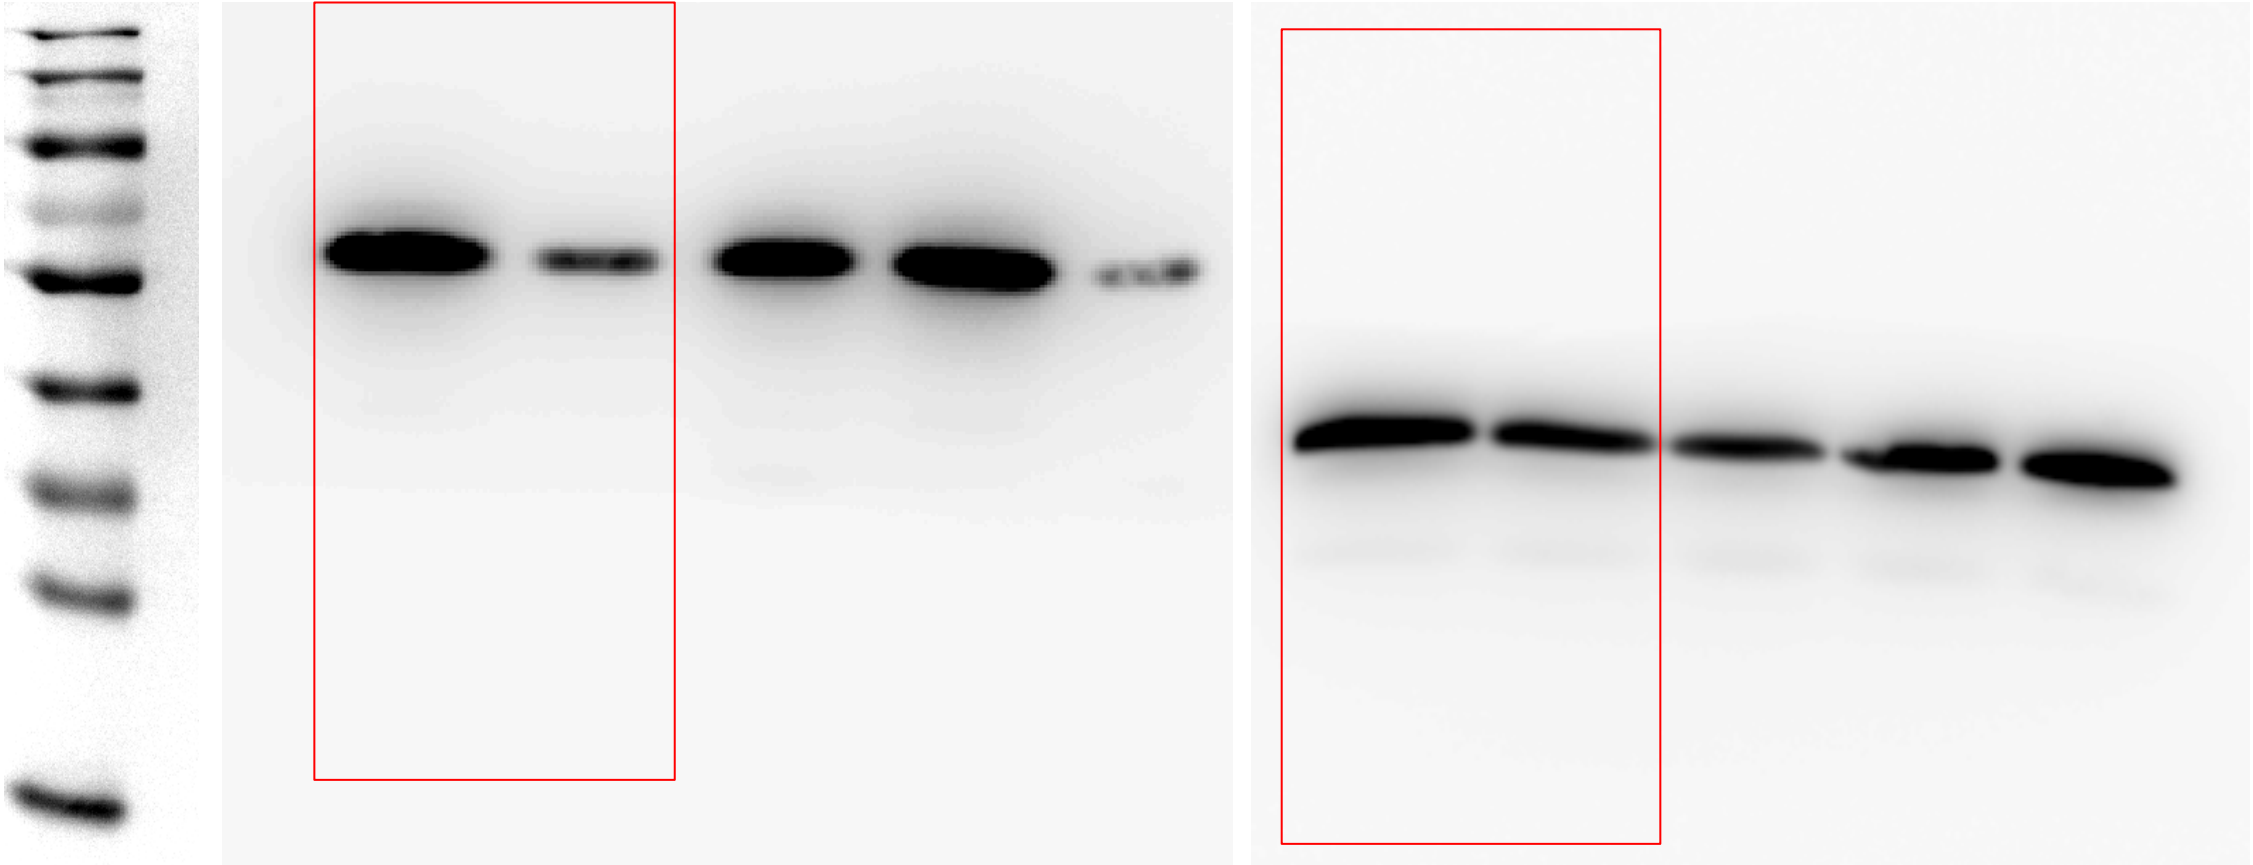

PINK1

$\beta$ -Actin

# 原始条带-figure 4a

Control 2 h 4 h 8 h 16 h 24 h

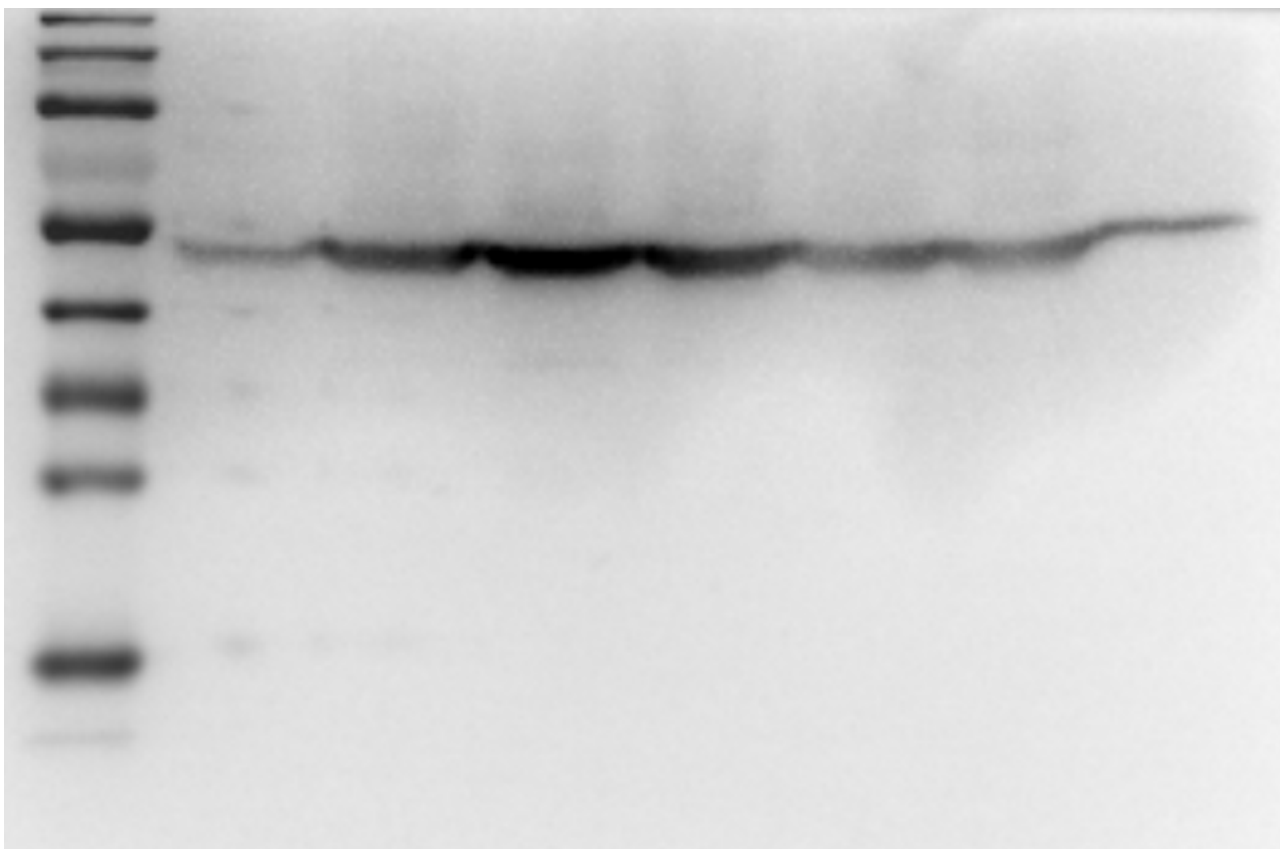

Parkin

Control 2 h 4 h 8 h 16 h 24 h

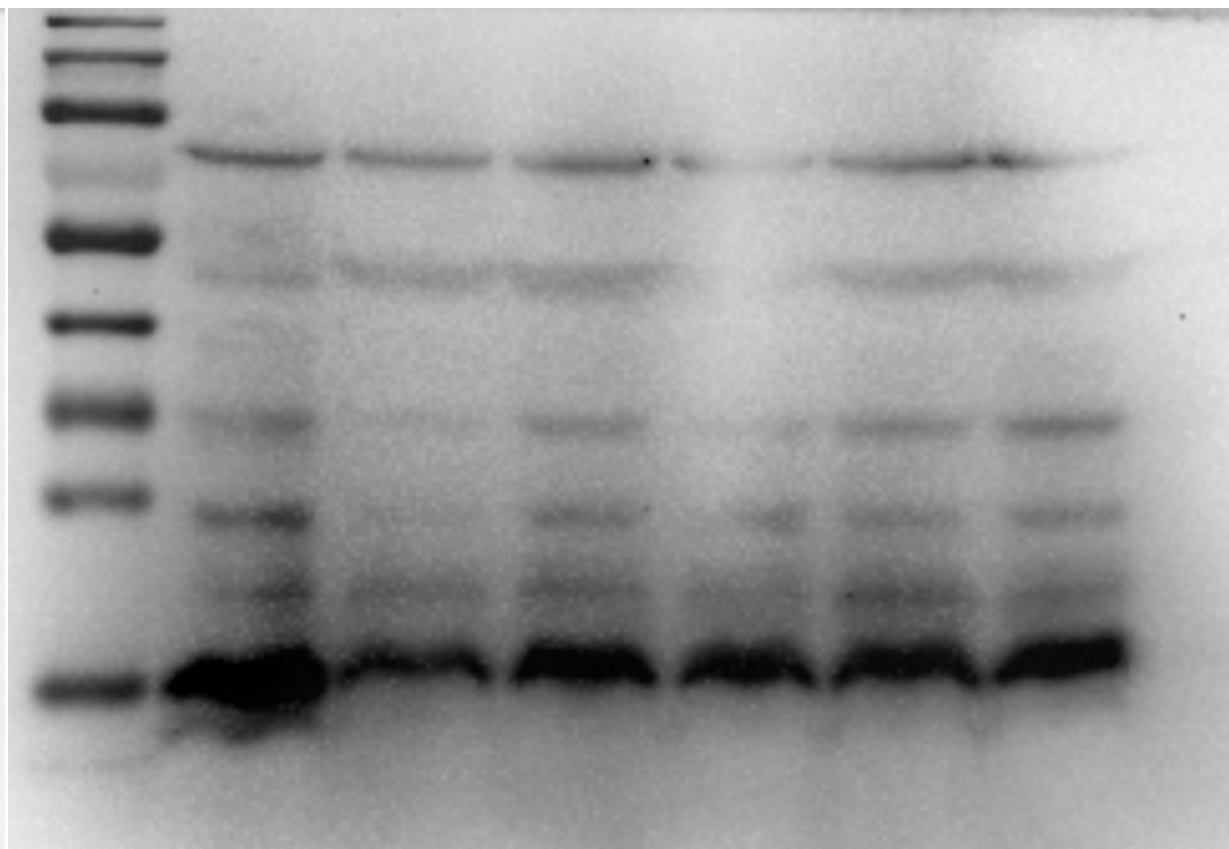

COXIV

# 原始条带-figure 4c

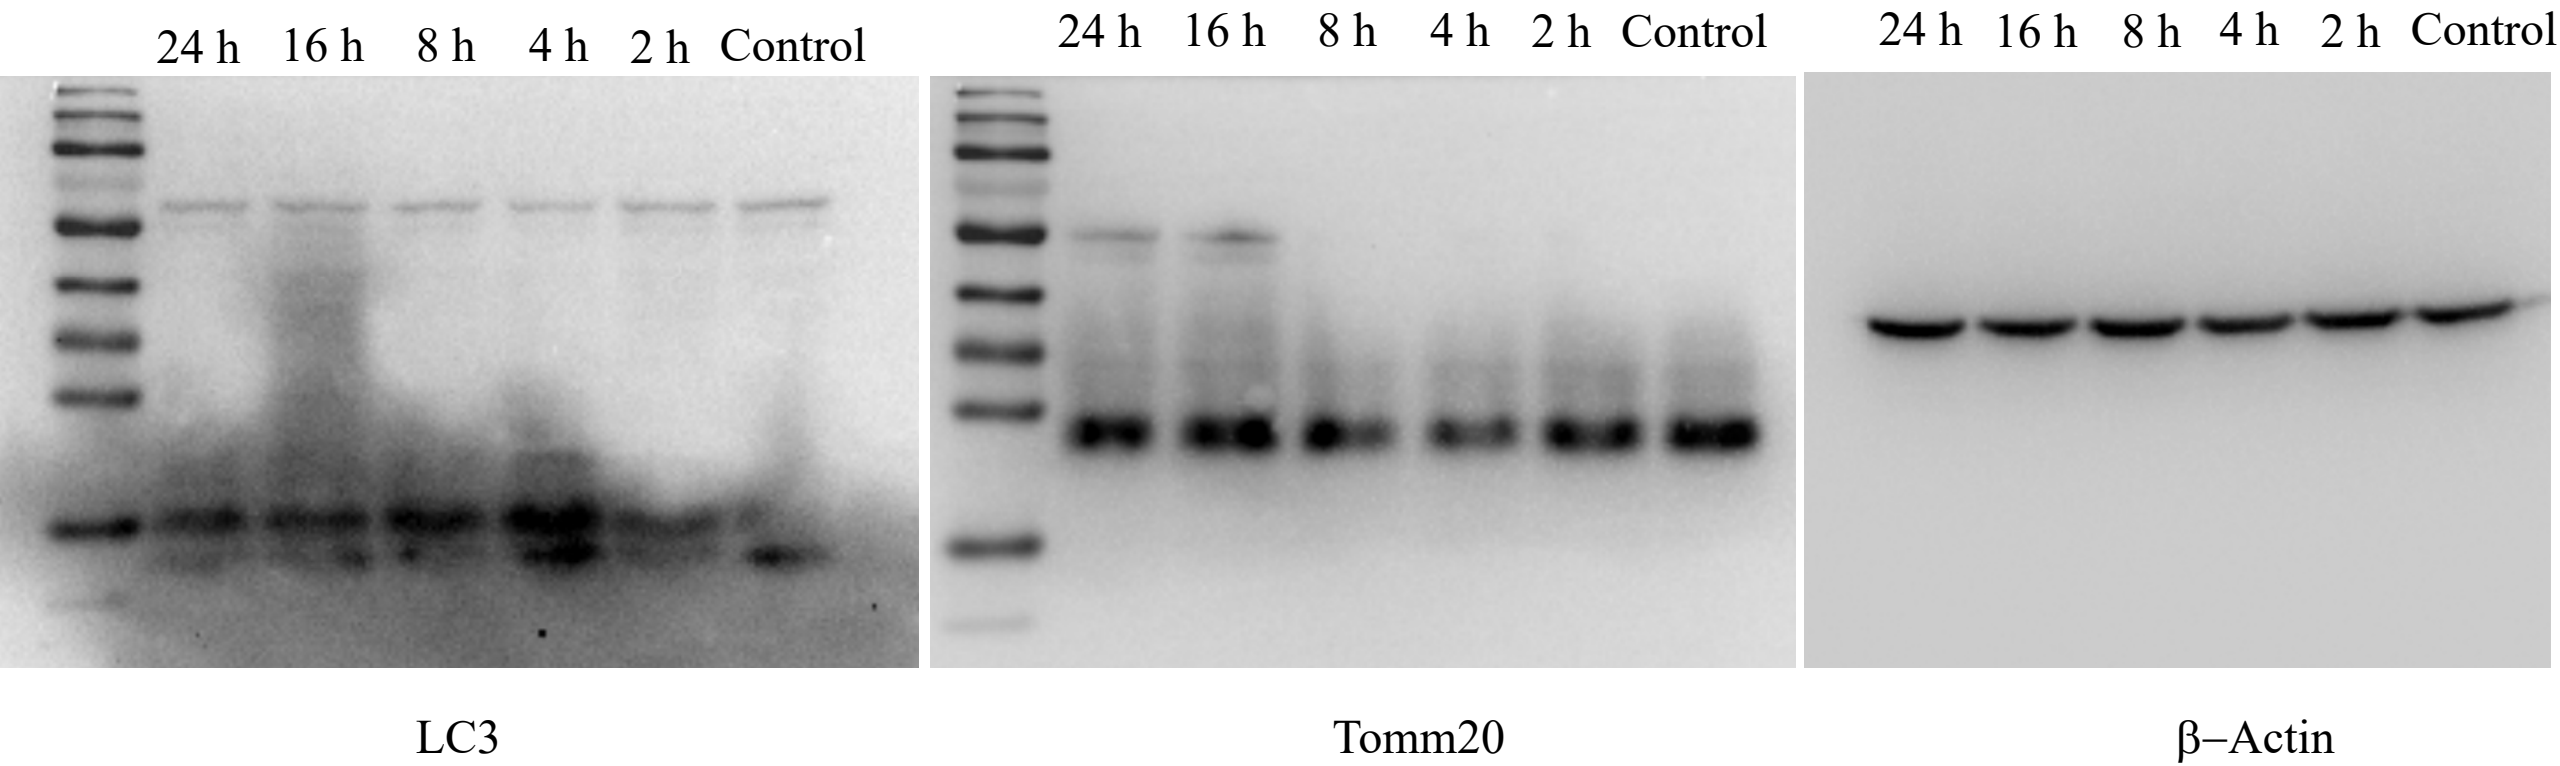

# 原始条带-figure 5a

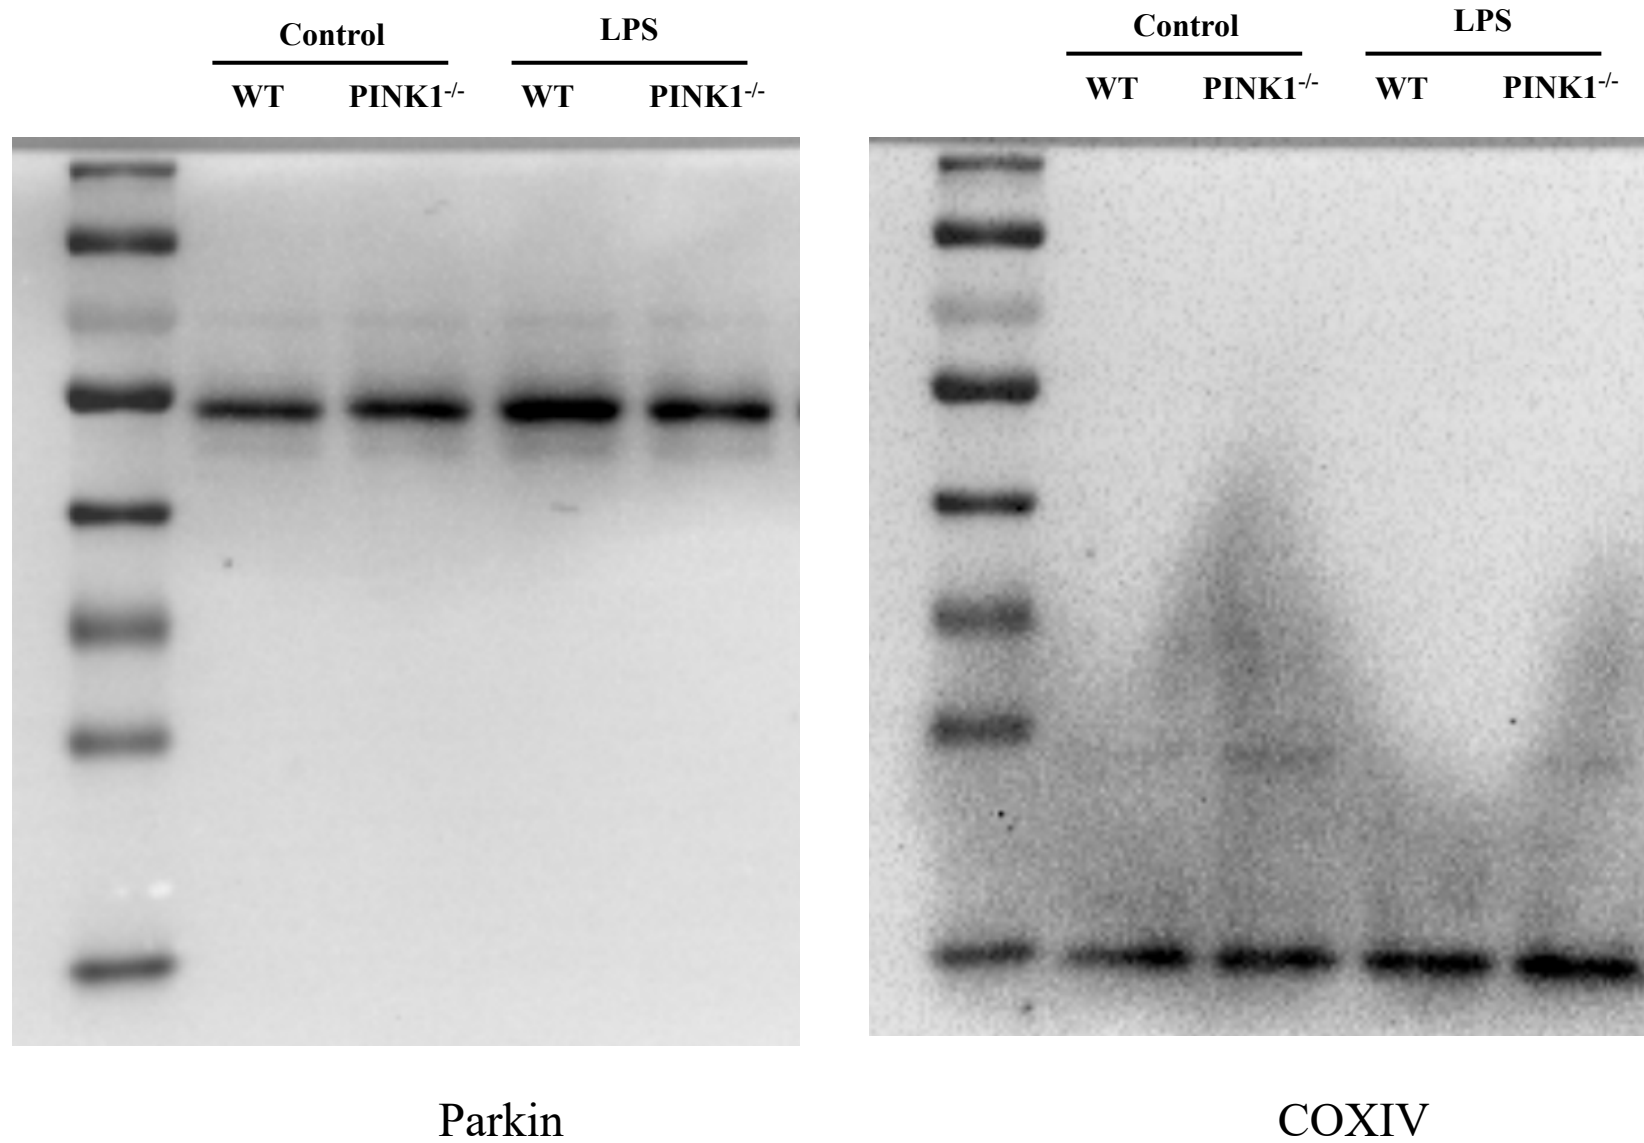

# 原始条带-figure 5d

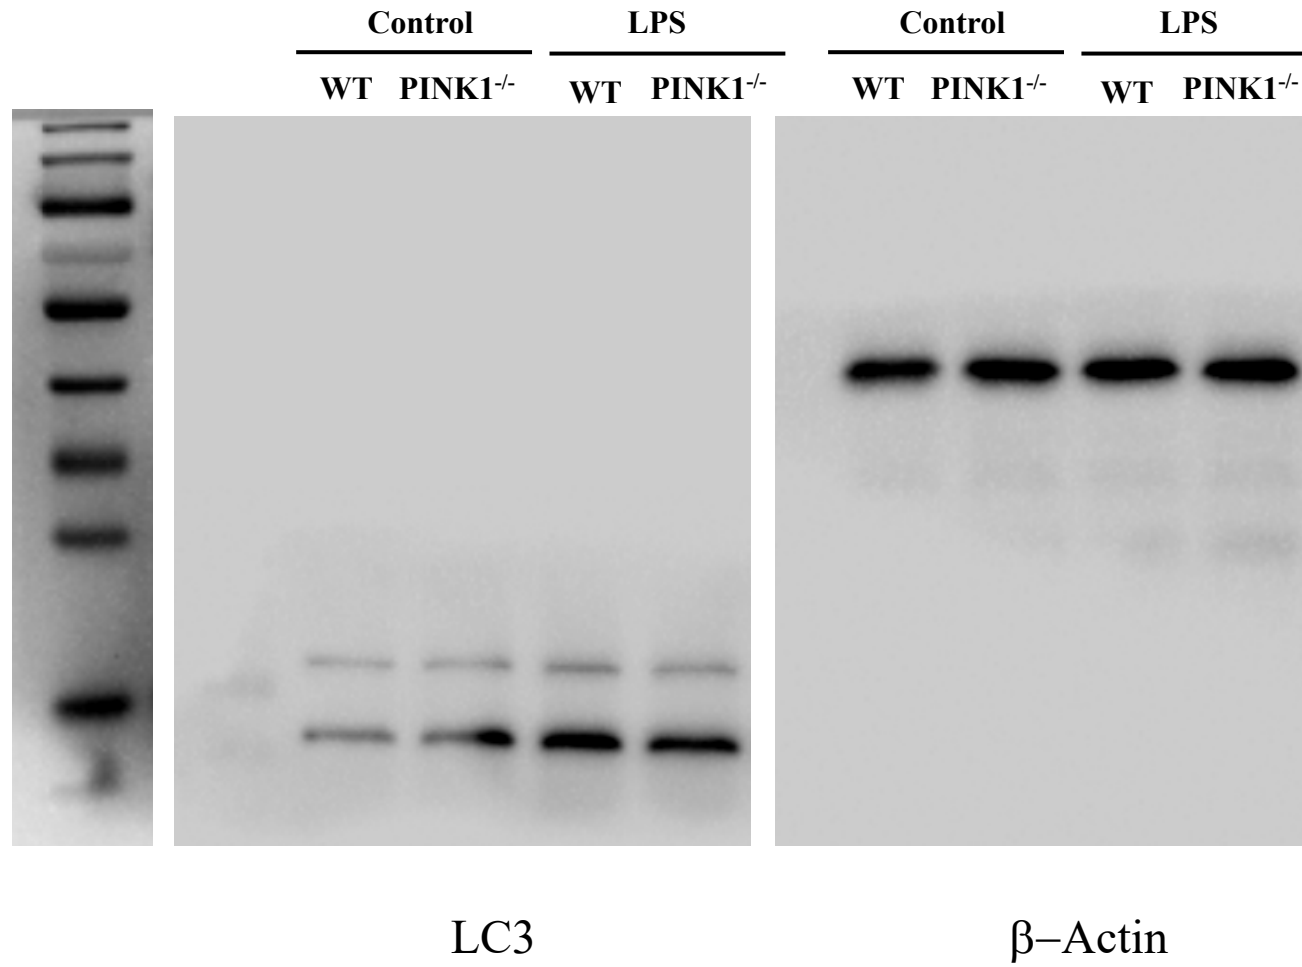

# 原始条带-figure 5d

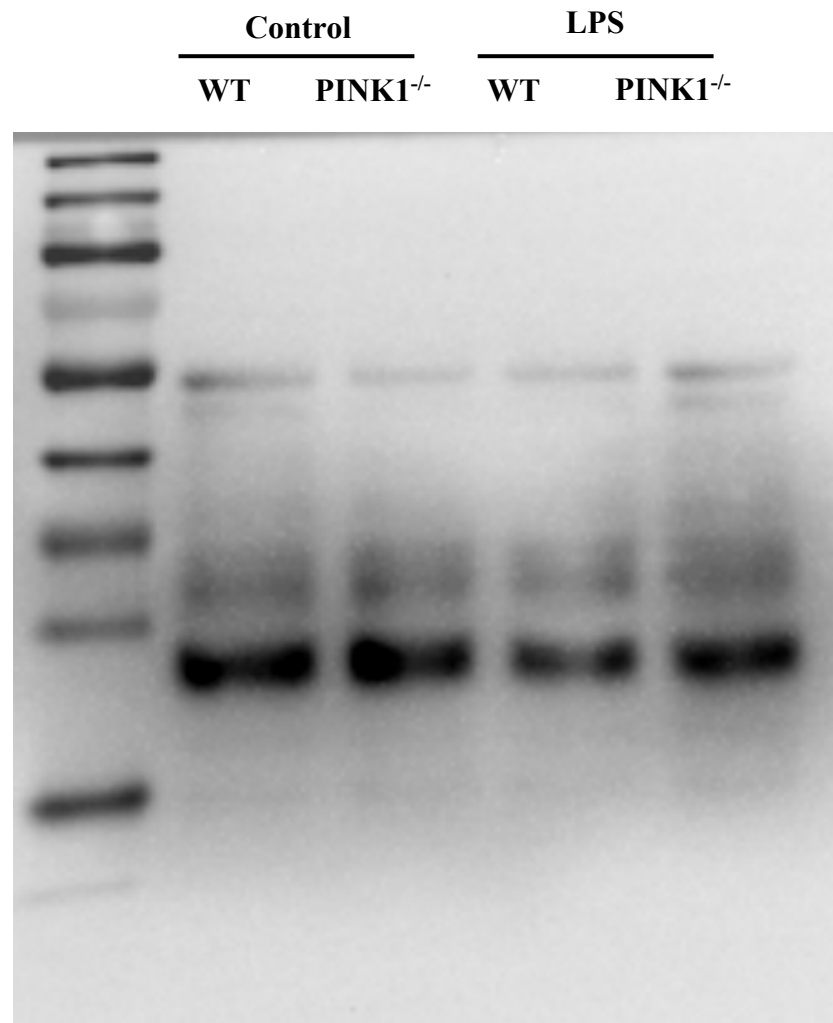

Tomm20

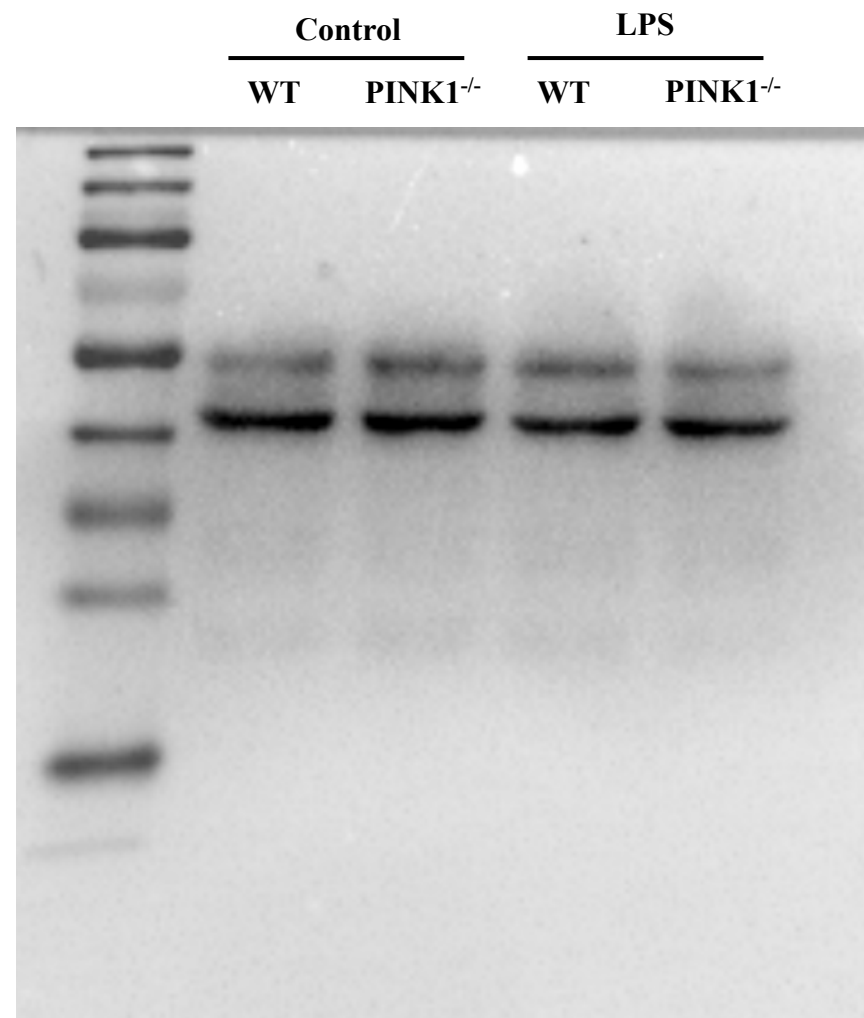

$\beta$ -Actin



# 原始条带-figure 6a

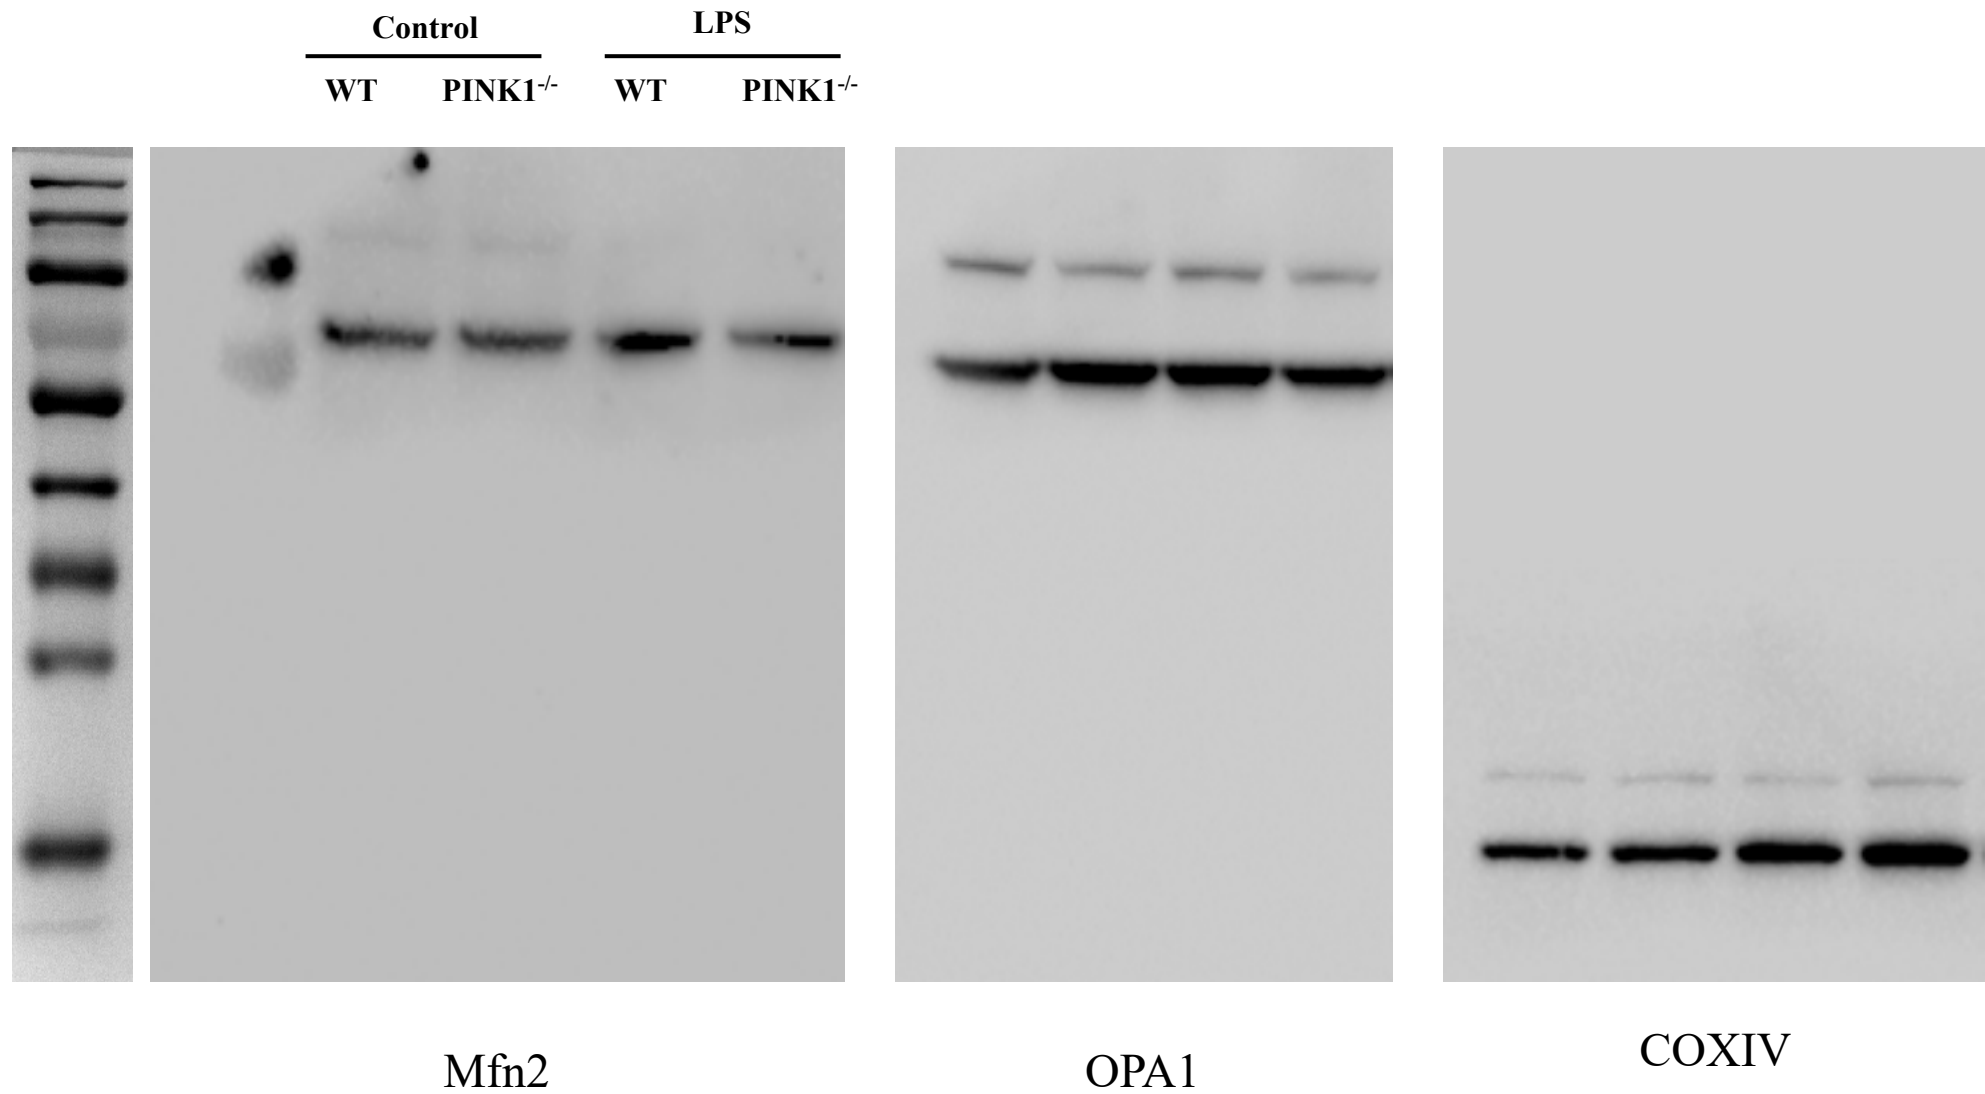

# 原始条带-figure 6d

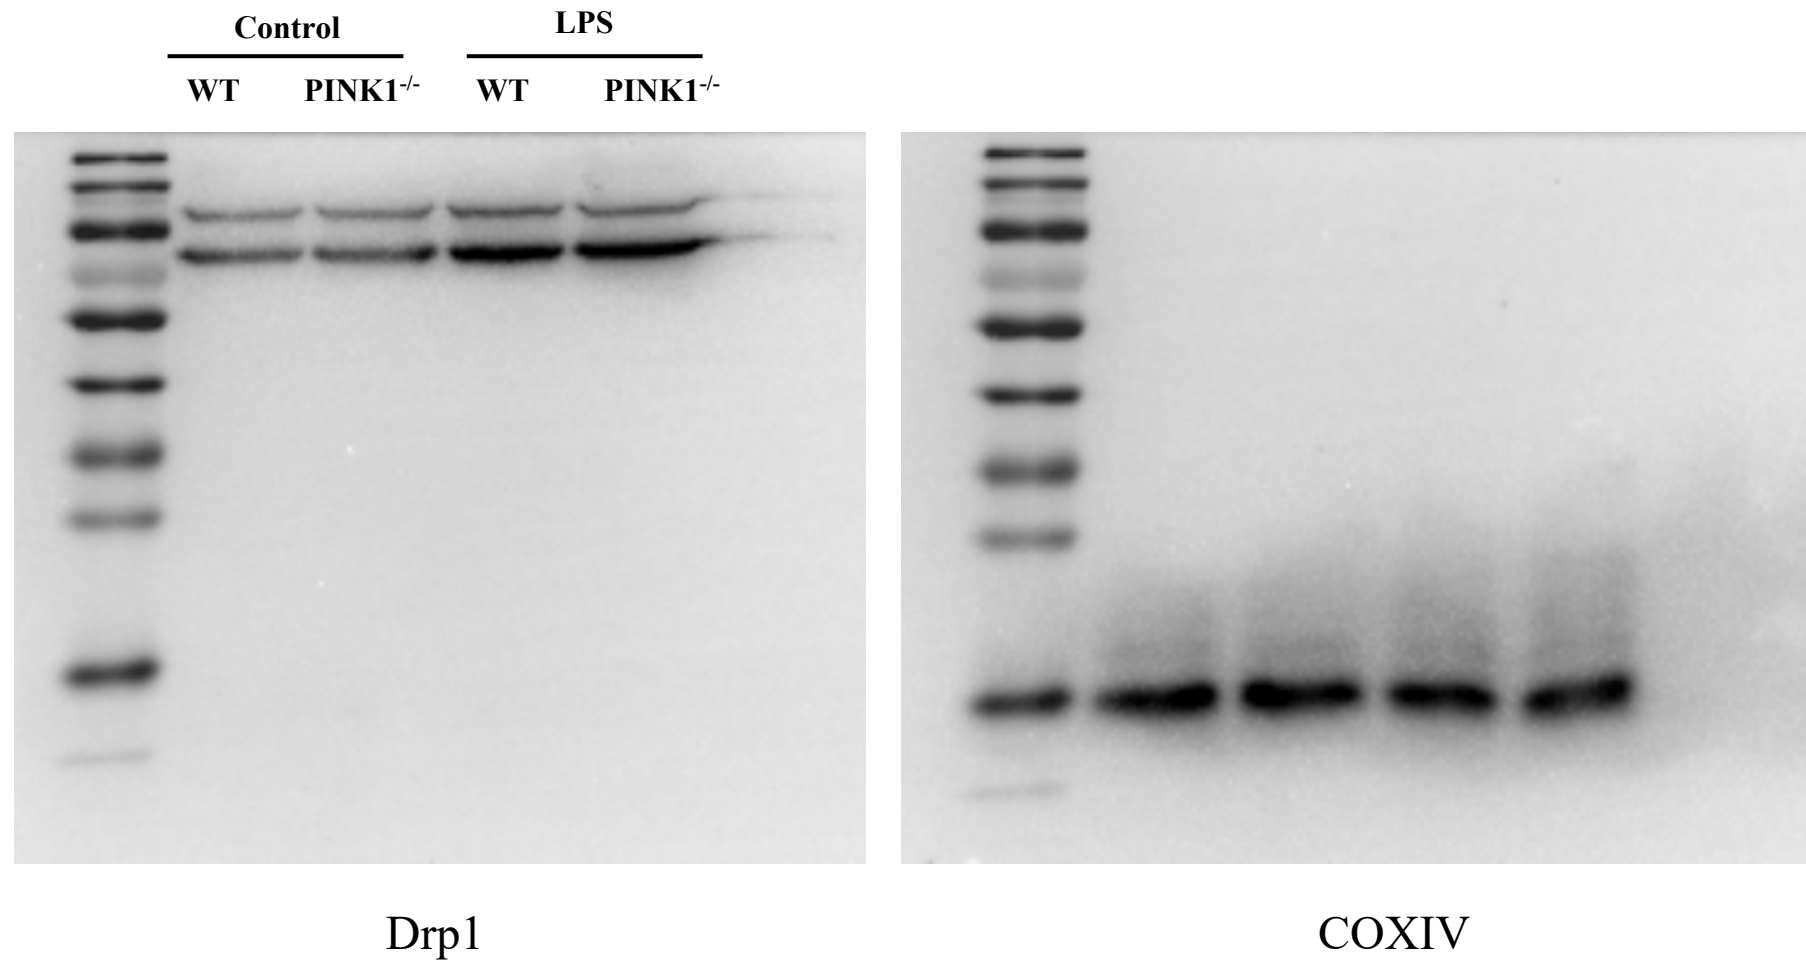

# 原始条带-figure 7j

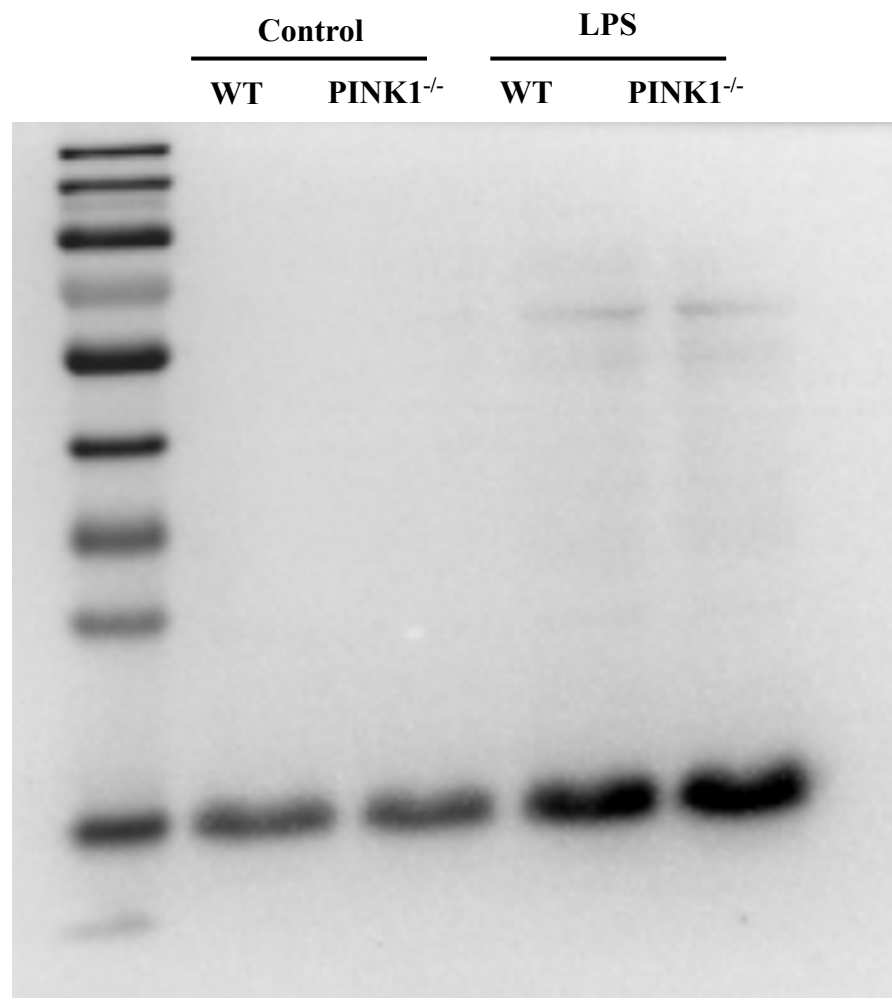

Cleaved caspase-3

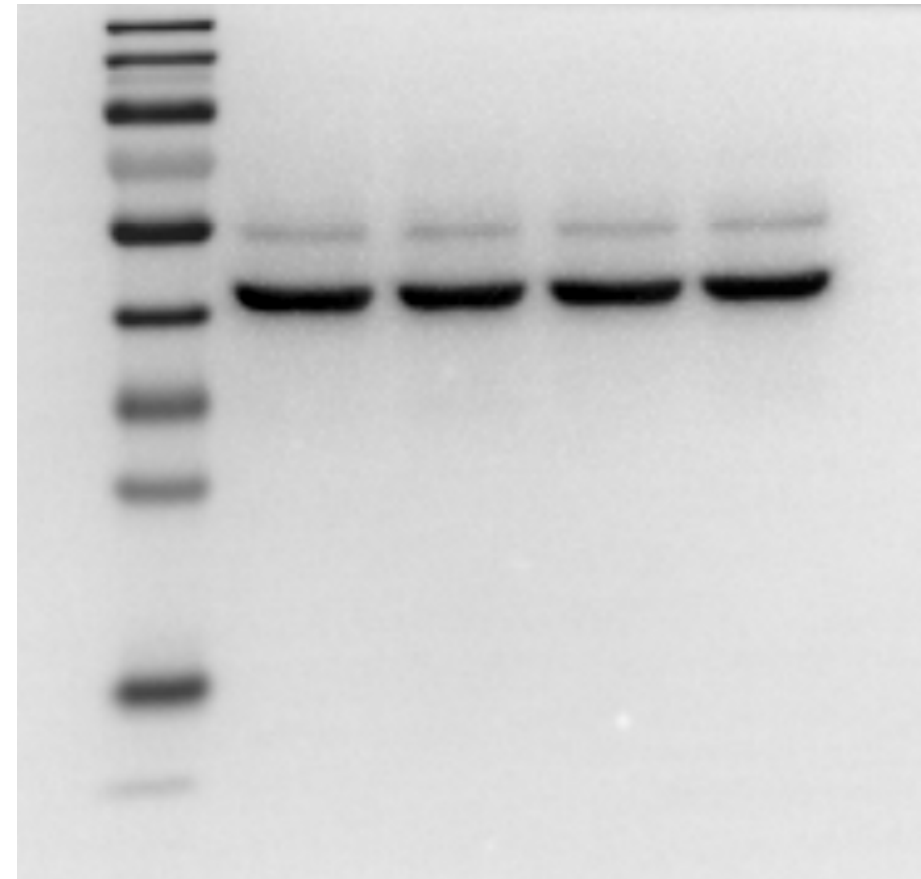

$\beta$ -Actin
